# Supplementary material for: The Impact of NRF2 Inhibition on Drug-Induced Colon Cancer Cell Death and p53 Activity: A Pilot Study
Source: MDPI journal article supplement (doi:10.3390/biom12030461), 2022-03-17
Supplement: s1 [file s1]

Supplementary Figure S1

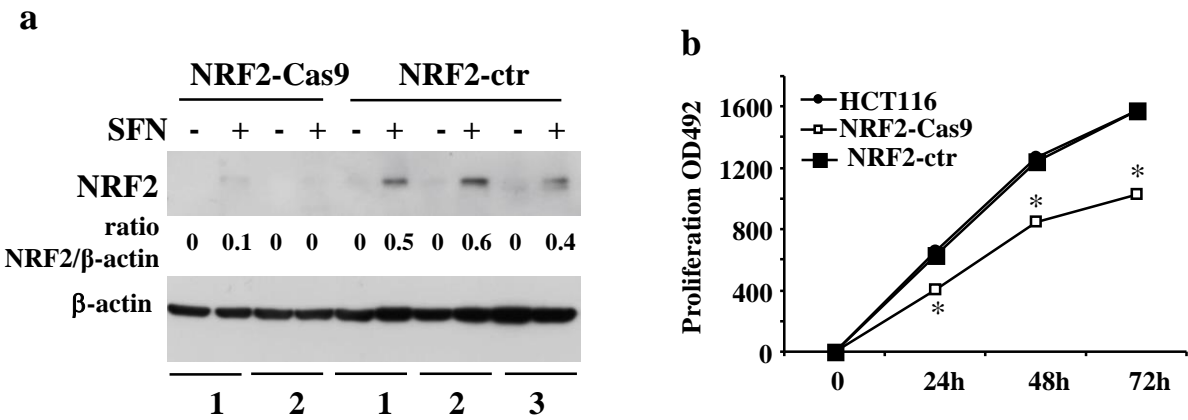

**Figure S1.** Analysis of NRF2 control and Cas9 clones. ( **a** ) NRF2-ctr (clones 1, 2, 3) and NRF2-Cas9 (clones 1, 2) were treated SFN (2  $\mu$ M) for 16 h and then analysed by Western blot to detect NRF2 protein. Actin was used as protein loading control. The ratio of NRF2 levels vs  $\beta$ -actin, following densitometric analysis using ImageJ software, is shown. ( **b** ) NRF2-ctr (clone 2), NRF2-Cas9 (clon 2) and HCT116 cells were exposed to SFN (2  $\mu$ M) for 24, 48 and 72 h, and cell viability was assessed by XTT assay. \* $P \leq 0.01$ .
